# Supplementary material for: Detection of the Endangered Siamese Bat Catfish (Oreoglanis siamensis Smith, 1933) in Doi Inthanon National Park Using Environmental DNA
Source: MDPI journal article supplement (doi:10.3390/ani13030538), 2023-02-03
Supplement: s1 [file s1]

**Supplementary Figure S1.** Sequence alignments of *O. siamensis* from Klang and Klang Phat rivers. A. COI region, B. *Cytb* region, C. 12S rRNA region, and D. 16S rRNA region.

A.

|                                                |                                                                       |
|------------------------------------------------|-----------------------------------------------------------------------|
| ↗Name                                          | G A G C C T T G A G C T G G A A T G G T C G G C A C C G C C C T C A G |
| ↗1. Oreoglanis siamensis from Klang river      | . . . . .                                                             |
| ↗2. Oreoglanis siamensis from Klang Phat river | . . . . .                                                             |
| ↗Name                                          | C C T C T T A A T C C G A G C G G A G C T G G C C C A G C C A G G A   |
| ↗1. Oreoglanis siamensis from Klang river      | . . . . .                                                             |
| ↗2. Oreoglanis siamensis from Klang Phat river | . . . . .                                                             |
| ↗Name                                          | A C T C T T T T G G G T G A C G A T C A A A T T T A T A A T G T T A   |
| ↗1. Oreoglanis siamensis from Klang river      | . . . . .                                                             |
| ↗2. Oreoglanis siamensis from Klang Phat river | . . . . .                                                             |
| ↗Name                                          | T C G T C A C T G C A C A T G C C T T C G T T A T A A T C T T C T T   |
| ↗1. Oreoglanis siamensis from Klang river      | . . . . .                                                             |
| ↗2. Oreoglanis siamensis from Klang Phat river | . . . . .                                                             |
| ↗Name                                          | T A T A G T A A T A C C T G T A A T A A T T G G A G G C T T C G G C   |
| ↗1. Oreoglanis siamensis from Klang river      | . . . . .                                                             |
| ↗2. Oreoglanis siamensis from Klang Phat river | . . . . .                                                             |
| ↗Name                                          | A A C T G A C T C G T C C C T C T A A T A A T T G G A G C C C C A G   |
| ↗1. Oreoglanis siamensis from Klang river      | . . . . .                                                             |
| ↗2. Oreoglanis siamensis from Klang Phat river | . . . . .                                                             |
| ↗Name                                          | A C A T A G C A T T T C C T C G A A T A A A T A A C A T A A G C T T   |
| ↗1. Oreoglanis siamensis from Klang river      | . . . . .                                                             |
| ↗2. Oreoglanis siamensis from Klang Phat river | . . . . .                                                             |
| ↗Name                                          | C T G A C T T C T G C C C C C A T C C T T T C T C C T A C T C C T G   |
| ↗1. Oreoglanis siamensis from Klang river      | . . . . .                                                             |
| ↗2. Oreoglanis siamensis from Klang Phat river | . . . . .                                                             |
| ↗Name                                          | G C C T C T T C T G G A A T T G A A G C A G G C G C A G G A A C A G   |
| ↗1. Oreoglanis siamensis from Klang river      | . . . . .                                                             |
| ↗2. Oreoglanis siamensis from Klang Phat river | . . . . .                                                             |
| ↗Name                                          | G C T G A A C T G T C T A C C C T C C C T T A G C A G G A A A C T T   |
| ↗1. Oreoglanis siamensis from Klang river      | . . . . .                                                             |
| ↗2. Oreoglanis siamensis from Klang Phat river | . . . . .                                                             |
| ↗Name                                          | A G C A C A C G C A G G G C C T T C T G T A G A C C T A A C C A T T   |
| ↗1. Oreoglanis siamensis from Klang river      | . . . . .                                                             |
| ↗2. Oreoglanis siamensis from Klang Phat river | . . . . .                                                             |
| ↗Name                                          | T T C T C A T T A C A C C T T G C A G G T G T A T C G T C T A T T C   |
| ↗1. Oreoglanis siamensis from Klang river      | . . . . .                                                             |
| ↗2. Oreoglanis siamensis from Klang Phat river | . . . . .                                                             |
| ↗Name                                          | T A G G A G C C A T T A A T T T T A T C A C A A C A A T T A T T A A   |
| ↗1. Oreoglanis siamensis from Klang river      | . . . . .                                                             |
| ↗2. Oreoglanis siamensis from Klang Phat river | . . . . .                                                             |
| ↗Name                                          | T A T A A A A C C T C C A G C A A T T T C C C A A T A C C A A A C C   |
| ↗1. Oreoglanis siamensis from Klang river      | . . . . .                                                             |
| ↗2. Oreoglanis siamensis from Klang Phat river | . . . . .                                                             |
| ↗Name                                          | C C C T T A T T C G T A T G A G C T G T C T T A A T T A C A G C T G   |
| ↗1. Oreoglanis siamensis from Klang river      | . . . . .                                                             |
| ↗2. Oreoglanis siamensis from Klang Phat river | . . . . .                                                             |
| ↗Name                                          | T A C T A C T A C T G T T A T C A C T A C C A G T C T T G G C A G C   |
| ↗1. Oreoglanis siamensis from Klang river      | . . . . .                                                             |
| ↗2. Oreoglanis siamensis from Klang Phat river | . . . . .                                                             |
| ↗Name                                          | T G G C A T C A C A A T A C T T T T A A C A G A T C G A A A C T T A   |
| ↗1. Oreoglanis siamensis from Klang river      | . . . . .                                                             |
| ↗2. Oreoglanis siamensis from Klang Phat river | . . . . .                                                             |
| ↗Name                                          | A A T A C C A C C T T C T T T G A T C C C T C A G G G G G A G G A G   |
| ↗1. Oreoglanis siamensis from Klang river      | . . . . .                                                             |
| ↗2. Oreoglanis siamensis from Klang Phat river | . . . . .                                                             |
| ↗Name                                          | A C C C A A T C C T T T A C C A A C A C C T A T T T T G A T T T T T   |
| ↗1. Oreoglanis siamensis from Klang river      | . . . . .                                                             |
| ↗2. Oreoglanis siamensis from Klang Phat river | . . . . .                                                             |
| ↗Name                                          | T G G T C                                                             |
| ↗1. Oreoglanis siamensis from Klang river      | . . . . .                                                             |
| ↗2. Oreoglanis siamensis from Klang Phat river | . . . . .                                                             |

B.

|                                          |                                                                         |
|------------------------------------------|-------------------------------------------------------------------------|
| Name                                     | C A G A A T G A T A T T T G T C C T C A T G G T A G G A C A T A C C C G |
| 1. Oreoglanis siamensis Klang river      | .                                                                       |
| 2. Oreoglanis siamensis Klang Phat river | .                                                                       |
| Name                                     | A C A A A T G C G G T T A T T A T T A C T A A T A G T A G C A G A A T T |
| 1. Oreoglanis siamensis Klang river      | .                                                                       |
| 2. Oreoglanis siamensis Klang Phat river | .                                                                       |
| Name                                     | A C T C C A A T A T T T C A A G T T T C T T T G T G G A G G T A C G A G |
| 1. Oreoglanis siamensis Klang river      | .                                                                       |
| 2. Oreoglanis siamensis Klang Phat river | .                                                                       |
| Name                                     | C C G T A G T A T A G G C C T C G C C C G A T G T G T A G G T A G A T G |
| 1. Oreoglanis siamensis Klang river      | .                                                                       |
| 2. Oreoglanis siamensis Klang Phat river | .                                                                       |
| Name                                     | A A A A A T A A G G A G G C T C C A T T T G C G T G T A G G T T T T G A |
| 1. Oreoglanis siamensis Klang river      | .                                                                       |
| 2. Oreoglanis siamensis Klang Phat river | .                                                                       |
| Name                                     | A T A A T T C A G C C G T T A T T T A C G T T A C G A C A G A T G T G G |
| 1. Oreoglanis siamensis Klang river      | .                                                                       |
| 2. Oreoglanis siamensis Klang Phat river | .                                                                       |
| Name                                     | A T T A C A G A T G A A A A G G C G G T G G A G A T G T C G G A G G T G |
| 1. Oreoglanis siamensis Klang river      | .                                                                       |
| 2. Oreoglanis siamensis Klang Phat river | .                                                                       |
| Name                                     | T A G T G T A T A G C T A A A A A T A A T C C T G T T A C A A T T T G T |
| 1. Oreoglanis siamensis Klang river      | .                                                                       |
| 2. Oreoglanis siamensis Klang Phat river | .                                                                       |
| Name                                     | A C T A T T A G G C A G A T A A G T A G G A T A G A A C C A A A A T T T |
| 1. Oreoglanis siamensis Klang river      | .                                                                       |
| 2. Oreoglanis siamensis Klang Phat river | .                                                                       |
| Name                                     | C A T A T T G C G G A A A T G T T A G A G G G G C G G G A A G A T C A   |
| 1. Oreoglanis siamensis Klang river      | .                                                                       |
| 2. Oreoglanis siamensis Klang Phat river | .                                                                       |
| Name                                     | A T A A G T G T G C T G T T A A C T A T T T T G A G T A A A G G G T G T |
| 1. Oreoglanis siamensis Klang river      | .                                                                       |
| 2. Oreoglanis siamensis Klang Phat river | .                                                                       |
| Name                                     | G T T T T T C G G G T G A T C A T T A G T T C T T A T A G T             |
| 1. Oreoglanis siamensis Klang river      | .                                                                       |
| 2. Oreoglanis siamensis Klang Phat river | .                                                                       |

C.

|                                          |                                                                         |
|------------------------------------------|-------------------------------------------------------------------------|
| Name                                     | G G C G G T G T G T G C A C G T C T C A G A G C C T A A T T C A A A A G |
| 1. Oreoglanis siamensis Klang river      | .                                                                       |
| 2. Oreoglanis siamensis Klang Phat river | .                                                                       |
| Name                                     | A A C T C T C T A T T T T C T T T T A C T A C T A A A T C C A C C T T   |
| 1. Oreoglanis siamensis Klang river      | .                                                                       |
| 2. Oreoglanis siamensis Klang Phat river | .                                                                       |
| Name                                     | T G T G A C A C C T A T T T C A A G G T G T T G T T C G T A T G C T C T |
| 1. Oreoglanis siamensis Klang river      | .                                                                       |
| 2. Oreoglanis siamensis Klang Phat river | .                                                                       |
| Name                                     | G T T G T A G A A A A T G T A G C C C A T T T C T A C C C A C T C C G T |
| 1. Oreoglanis siamensis Klang river      | .                                                                       |
| 2. Oreoglanis siamensis Klang Phat river | .                                                                       |
| Name                                     | A C G C T A C A C C T C G A C C T G A C G T T T T G A G G G C A T A T   |
| 1. Oreoglanis siamensis Klang river      | .                                                                       |
| 2. Oreoglanis siamensis Klang Phat river | .                                                                       |
| Name                                     | C G A T T T T G C T C A C T G T T G T A C C T T C A C A G G G T A A G C |
| 1. Oreoglanis siamensis Klang river      | .                                                                       |
| 2. Oreoglanis siamensis Klang Phat river | .                                                                       |
| Name                                     | T G A C G A C G G C G G T A T A T A G A C G G T G T G A G A C A A G G A |
| 1. Oreoglanis siamensis Klang river      | .                                                                       |
| 2. Oreoglanis siamensis Klang Phat river | C                                                                       |
| Name                                     | G T G G T A A G G T T T A A C G G G G A T T A T C G G T T T T A G A A C |
| 1. Oreoglanis siamensis Klang river      | .                                                                       |
| 2. Oreoglanis siamensis Klang Phat river | .                                                                       |
| Name                                     | A G G C T C C T C T A G G T G G T T C T G A G A C A C C G C C A A G T C |
| 1. Oreoglanis siamensis Klang river      | .                                                                       |
| 2. Oreoglanis siamensis Klang Phat river | .                                                                       |
| Name                                     | C T T T G G G                                                           |
| 1. Oreoglanis siamensis Klang river      | .                                                                       |
| 2. Oreoglanis siamensis Klang Phat river | .                                                                       |



D.

|                                           |                                                                         |
|-------------------------------------------|-------------------------------------------------------------------------|
| ↻Name                                     | C A T A C C T G C C C A G T G A A A A T T T T A A A C G G C C G C G G   |
| ↻1. Oreoglanis siamensis Klang Phat river | . . . . .                                                               |
| ↻2. Oreoglanis siamensis Klang river      | . . . . .                                                               |
| ↻Name                                     | A T T C T A A C C G T G C A A A G G T A G C G C A A T C A C T T G T C T |
| ↻1. Oreoglanis siamensis Klang Phat river | . . . . .                                                               |
| ↻2. Oreoglanis siamensis Klang river      | . . . . .                                                               |
| ↻Name                                     | C T T A A A T A G A G A C C T G T A T G A A T G G T A A G A C G A G G G |
| ↻1. Oreoglanis siamensis Klang Phat river | . . . . .                                                               |
| ↻2. Oreoglanis siamensis Klang river      | . . . . .                                                               |
| ↻Name                                     | C T T A A C T G T C T C C C T T T T C A A G T C A A T G A A A T T G A T |
| ↻1. Oreoglanis siamensis Klang Phat river | . . . . .                                                               |
| ↻2. Oreoglanis siamensis Klang river      | . . . . .                                                               |
| ↻Name                                     | T G A T C T G C C C G T G C A G A A G C G G A C A T A A A A A T A C A A |
| ↻1. Oreoglanis siamensis Klang Phat river | . . . . .                                                               |
| ↻2. Oreoglanis siamensis Klang river      | . . . . .                                                               |
| ↻Name                                     | G A C G A G A A G A C C C T T T G G A A C T T A A G A C A T C A G A C C |
| ↻1. Oreoglanis siamensis Klang Phat river | . . . . .                                                               |
| ↻2. Oreoglanis siamensis Klang river      | . . . . .                                                               |
| ↻Name                                     | C A T A T A C A T A A T C C C A A C A T T C A T T A A C C T A A T A G T |
| ↻1. Oreoglanis siamensis Klang Phat river | . . . . .                                                               |
| ↻2. Oreoglanis siamensis Klang river      | T . . . . .                                                             |
| ↻Name                                     | A A T T G G T C C C A G T C T T T G G T T G G G G C G A C C G C G G A A |
| ↻1. Oreoglanis siamensis Klang Phat river | . . . . .                                                               |
| ↻2. Oreoglanis siamensis Klang river      | . . . . .                                                               |
| ↻Name                                     | G A A A A C A G A G C T A C C G C G C A G A T G G G G C A A T C C C C T |
| ↻1. Oreoglanis siamensis Klang Phat river | . . . . .                                                               |
| ↻2. Oreoglanis siamensis Klang river      | . . . . .                                                               |
| ↻Name                                     | A A A A T C A A G A G A G A C A T C T C T A A A T A A C A G A A C T T C |
| ↻1. Oreoglanis siamensis Klang Phat river | . . . . .                                                               |
| ↻2. Oreoglanis siamensis Klang river      | . . . . .                                                               |
| ↻Name                                     | T G A C C T T G A A G A T C C G G C A C T T A C C G A A C A A C G A A C |
| ↻1. Oreoglanis siamensis Klang Phat river | . . . . .                                                               |
| ↻2. Oreoglanis siamensis Klang river      | . . . . .                                                               |
| ↻Name                                     | C A A G C T A C C C C A G G G A T A A C A G C G C A A T C C C C T T T T |
| ↻1. Oreoglanis siamensis Klang Phat river | . . . . .                                                               |
| ↻2. Oreoglanis siamensis Klang river      | . . . . .                                                               |
| ↻Name                                     | A G A G C C C A T A T C G A C A A G G G G T T T A C G A C C T C G A T   |
| ↻1. Oreoglanis siamensis Klang Phat river | . . . . .                                                               |
| ↻2. Oreoglanis siamensis Klang river      | . . . . .                                                               |
| ↻Name                                     | G T T G G A T C A G G A C A T C C T A A T G G T G C A G C C G C T A T T |
| ↻1. Oreoglanis siamensis Klang Phat river | . . . . .                                                               |
| ↻2. Oreoglanis siamensis Klang river      | . . . . .                                                               |
| ↻Name                                     | A A G G G T T C G T T T G T T C A A C G A                               |
| ↻1. Oreoglanis siamensis Klang Phat river | . . . . .                                                               |
| ↻2. Oreoglanis siamensis Klang river      | . . . . .                                                               |
