# Supplementary material for: Detection of the Endangered Siamese Bat Catfish (Oreoglanis siamensis Smith, 1933) in Doi Inthanon National Park Using Environmental DNA
Source: MDPI journal article supplement (doi:10.3390/ani13030538), 2023-02-03
Supplement: s1 [file s1]

**Supplementary Table S1.** GenBank accession numbers of species were used for primer design in this study.

| Species                           | COI      | Cytb     | 12S rRNA | 16S rRNA |
|-----------------------------------|----------|----------|----------|----------|
| <i>Amblyceps foratum</i>          | EU490875 | EU490924 |          |          |
| <i>Bagarius bagarius</i>          | MT812082 | JQ413979 |          | KT878056 |
| <i>Bagarius suchus</i>            | DQ846698 |          |          |          |
| <i>Bagarius yarrelli</i>          | KM610424 | AF416897 | LC049878 | AY445910 |
| <i>Bagrichthys majusculus</i>     |          | HQ257279 | HQ257335 | HQ257335 |
| <i>Bagrichthys obscurus</i>       |          | HQ257281 | HQ257337 | HQ257337 |
| <i>Barilius pulchellus</i>        | HM224207 | MN541305 | KU821706 | KU884655 |
| <i>Cephalocassis borneensis</i>   |          | FJ626200 | FJ626134 | FJ626071 |
| <i>Channa striata</i>             | MW591031 | MK258902 | KU852423 | MN380041 |
| <i>Crossocheilus reticulatus</i>  | MN342371 | MH688196 | MH688257 | HM536783 |
| <i>Cyclocheilichthys repasson</i> | MW147376 | MH688190 | MH688249 | DQ464911 |
| <i>Danio albolineatus</i>         | MN342400 | HM224262 | LC193222 | AF322663 |
| <i>Devario aequipinnatus</i>      | MT954943 | HM224273 | HM224273 | KT835295 |
| <i>Devario annandalei</i>         | KY124375 | HM224274 |          |          |
| <i>Devario laoensis</i>           | MF172771 | HM224278 |          |          |
| <i>Discherodontus schroederi</i>  | JX066749 | JX066767 | LC069415 | JX066733 |
| <i>Esomus metallicus</i>          | MW591064 | EF151101 | LC049901 | FJ753467 |
| <i>Exostoma berdmorei</i>         | DQ846699 |          |          |          |
| <i>Gyrinocheilus aymonieri</i>    | MN342601 | MN541332 | AY050541 | AF357584 |
| <i>Hemibagrus filamentus</i>      | JQ289147 | HQ257283 | HQ257341 | JQ248060 |
| <i>Hemibagrus spilopterus</i>     | MK049455 | MN541353 |          |          |
| <i>Hemibagrus wyckii</i>          | MG981082 | HQ257287 | HQ257345 | HQ257345 |
| <i>Hemibagrus wyckioides</i>      | EU490862 | EU490911 | HQ257346 | JQ248063 |
| <i>Mastacembelus tinwini</i>      | MW591093 | KT944547 |          |          |
| <i>Mystus albolineatus</i>        | KF824812 | KF862963 |          |          |
| <i>Mystus bocourti</i>            | EU490863 | EU490912 |          | JQ248058 |
| <i>Mystus multiradiatus</i>       | JX177677 | HQ257295 | HQ257353 | JQ248055 |

| Species                                 | COI      | Cytb     | 12S rRNA | 16S rRNA |
|-----------------------------------------|----------|----------|----------|----------|
| <i>Mystus singaringan</i>               | MN992971 | MN541357 | MH688291 | JQ248059 |
| <i>Neolissochilus stracheyi</i>         | MN096214 | DQ464987 | HQ699803 | KT878231 |
| <i>Notopterus notopterus</i>            | JX983410 | MZ381350 | AF508062 | LC388003 |
| <i>Opsarius koratensis</i>              | HM224205 | HM224322 | LC193403 |          |
| <i>Opsarius pulchellus</i>              | HM224207 | MN541305 | MH688272 | KU500876 |
| <i>Oreoglanis immaculatus</i>           | JQ859840 |          |          |          |
| <i>Oreoglanis macropterus</i>           |          | DQ192479 |          |          |
| <i>Oreoglanis siamensis</i>             | MZ753673 | MZ773400 | MZ766142 | MZ766143 |
| <i>Pareuchiloglanis anteanalis</i>      | DQ508085 | AY191610 |          | AY445903 |
| <i>Pareuchiloglanis feae</i>            |          | JN986971 |          |          |
| <i>Pareuchiloglanis hupingshanensis</i> |          | KU356571 |          |          |
| <i>Pareuchiloglanis myzostoma</i>       | MH853829 |          |          |          |
| <i>Pareuchiloglanis sinensis</i>        | MF122630 | DQ192484 |          | AY445904 |
| <i>Pethia stoliczkana</i>               | MN342718 | MT483275 | LC193389 | KP712685 |
| <i>Pseudomystus siamensis</i>           |          |          |          |          |
| <i>Raiamas guttatus</i>                 | MK116352 | HM483378 |          |          |
| <i>Rasbora paviana</i>                  | MW147436 | MN541324 | MH688286 | U21554   |
| <i>Scaphiodonichthys acanthopterus</i>  | KJ994655 | KJ994707 |          | KP712612 |
| <i>Schistura poculi</i>                 | MG238142 | MG238239 |          |          |
| <i>Schistura pridii</i>                 |          | KP738603 |          |          |
| <i>Systemus rubripinnis</i>             | MK448198 |          |          |          |
| <i>Tor tambroides</i>                   | KU692919 | HM536824 | HQ699796 | AY973162 |
