# Supplementary material for: Detection of the Endangered Siamese Bat Catfish (Oreoglanis siamensis Smith, 1933) in Doi Inthanon National Park Using Environmental DNA
Source: MDPI journal article supplement (doi:10.3390/ani13030538), 2023-02-03
Supplement: s1 [file s1]

**Supplemental Table S3.** Overview of sequence alignments (160 bp) between positive qPCR amplicons from eDNA assays and *O. siamensis* gDNA sequence. One eDNA amplicon was randomly selected for sequencing from each sampling site for each sampling year (gray highlighted).

| Site | eDNA detection<br>(15 Replicates) |   |   |   |   |      |   |   |   |   |      |   |   |   |   | Positive qPCR<br>replicates | Sequence similarity<br>between the<br>amplicon and the<br>target species gDNA<br>(%) |
|------|-----------------------------------|---|---|---|---|------|---|---|---|---|------|---|---|---|---|-----------------------------|--------------------------------------------------------------------------------------|
|      | 2019                              |   |   |   |   | 2020 |   |   |   |   | 2021 |   |   |   |   |                             |                                                                                      |
| KP1  | ✓                                 | ✓ | ✓ | ✓ | x | ✓    | ✓ | ✓ | ✓ | ✓ | ✓    | ✓ | ✓ | ✓ | ✓ | 14/15                       | 100                                                                                  |
| KP2  | ✓                                 | ✓ | ✓ | ✓ | ✓ | ✓    | x | ✓ | ✓ | ✓ | ✓    | ✓ | ✓ | ✓ | ✓ | 14/15                       | 100                                                                                  |
| KP3  | ✓                                 | ✓ | ✓ | ✓ | x | ✓    | ✓ | ✓ | ✓ | ✓ | ✓    | ✓ | ✓ | ✓ | x | 13/15                       | 100                                                                                  |
| KP4  | ✓                                 | ✓ | ✓ | ✓ | ✓ | ✓    | ✓ | ✓ | ✓ | ✓ | ✓    | ✓ | ✓ | ✓ | ✓ | 15/15                       | 100                                                                                  |
| K1   | ✓                                 | x | ✓ | x | ✓ | x    | ✓ | x | ✓ | ✓ | ✓    | x | x | ✓ | ✓ | 9/15                        | 100                                                                                  |
| K2   | x                                 | ✓ | ✓ | ✓ | ✓ | ✓    | x | x | ✓ | ✓ | ✓    | ✓ | ✓ | x | ✓ | 11/15                       | 100                                                                                  |
| K4   | ✓                                 | ✓ | x | x | ✓ | x    | ✓ | ✓ | x | ✓ | x    | ✓ | x | ✓ | ✓ | 9/15                        | 100                                                                                  |
| K5   | ✓                                 | ✓ | ✓ | ✓ | x | ✓    | ✓ | x | ✓ | ✓ | ✓    | ✓ | ✓ | ✓ | ✓ | 13/15                       | 100                                                                                  |
| K7   | x                                 | ✓ | x | ✓ | ✓ | ✓    | ✓ | ✓ | ✓ | ✓ | ✓    | ✓ | ✓ | ✓ | x | 11/15                       | 100                                                                                  |
| K8   | ✓                                 | x | x | ✓ | ✓ | ✓    | ✓ | ✓ | ✓ | ✓ | ✓    | ✓ | ✓ | x | x | 11/15                       | 100                                                                                  |
| K9   | ✓                                 | ✓ | ✓ | x | ✓ | ✓    | x | ✓ | x | ✓ | ✓    | x | ✓ | ✓ | ✓ | 11/15                       | 100                                                                                  |
| K10  | ✓                                 | ✓ | ✓ | ✓ | ✓ | ✓    | ✓ | ✓ | ✓ | ✓ | ✓    | ✓ | ✓ | x | ✓ | 14/15                       | 100                                                                                  |
