# Supplementary material for: Detection of the Endangered Siamese Bat Catfish (Oreoglanis siamensis Smith, 1933) in Doi Inthanon National Park Using Environmental DNA
Source: MDPI journal article supplement (doi:10.3390/ani13030538), 2023-02-03
Supplement: s1 [file s1]

**Supplementary Table 2.** Geographic coordinates of the sampling sites.

| Sampling site | River      | Geographic coordinates |
|---------------|------------|------------------------|
| KP1           | Klang Phat | 18.560556, 98.544889   |
| KP2           |            | 18.560139, 98.545583   |
| KP3           |            | 18.544389, 98.564500   |
| KP4           |            | 18.54145, 98.5728900   |
| K1            | Klang      | 18.546560, 98.513250   |
| K2            |            | 18.548270, 98.517550   |
| K3            |            | 18.544900, 98.517620   |
| K4            |            | 18.542000, 98.523180   |
| K5            |            | 18.538390, 98.525160   |
| K6            |            | 18.536310, 98.523100   |
| K7            |            | 18.525210, 98.522250   |
| K8            |            | 18.541889, 98.550111   |
| K9            |            | 18.541690, 98.599690   |
| K10           |            | 18.507180, 98.661670   |
| K11           |            | 18.495270, 98.667570   |
