# Supplementary material for: Detection of the Endangered Siamese Bat Catfish (Oreoglanis siamensis Smith, 1933) in Doi Inthanon National Park Using Environmental DNA
Source: Animals (Basel). 2023 Feb 3;13(3):538. doi: 10.3390/ani13030538 (PMC9913137; doi:10.3390/ani13030538)
Supplement: Supplementary file 1 [file animals-13-00538-s001.zip]

Archive with 4 entries (4 files):
- animals-1939836-Supplementary Figure S1.pdf
- animals-1939836-Supplementary Table S1.pdf
- animals-1939836-Supplementary Table S2.pdf
- animals-1939836-Supplementary Table S3.pdf
